# Supplementary material
Source: PubMed Central journal article supplement (PMC3434778)
Supplement: supp_M112.017178_mcp.M112.017178-1.pdf [file supp_M112.017178_mcp.M112.017178-1.pdf]

**Supplementary Figure 1:** Protein identifications and chromatographic properties under different protein loadings. **(A)** Relationship between protein abundance in the sample and its identification by MS/MS in different total protein sample amounts. **(B)** Box plot of peak widths during liquid chromatography as aligned on the median for different protein amounts loaded.

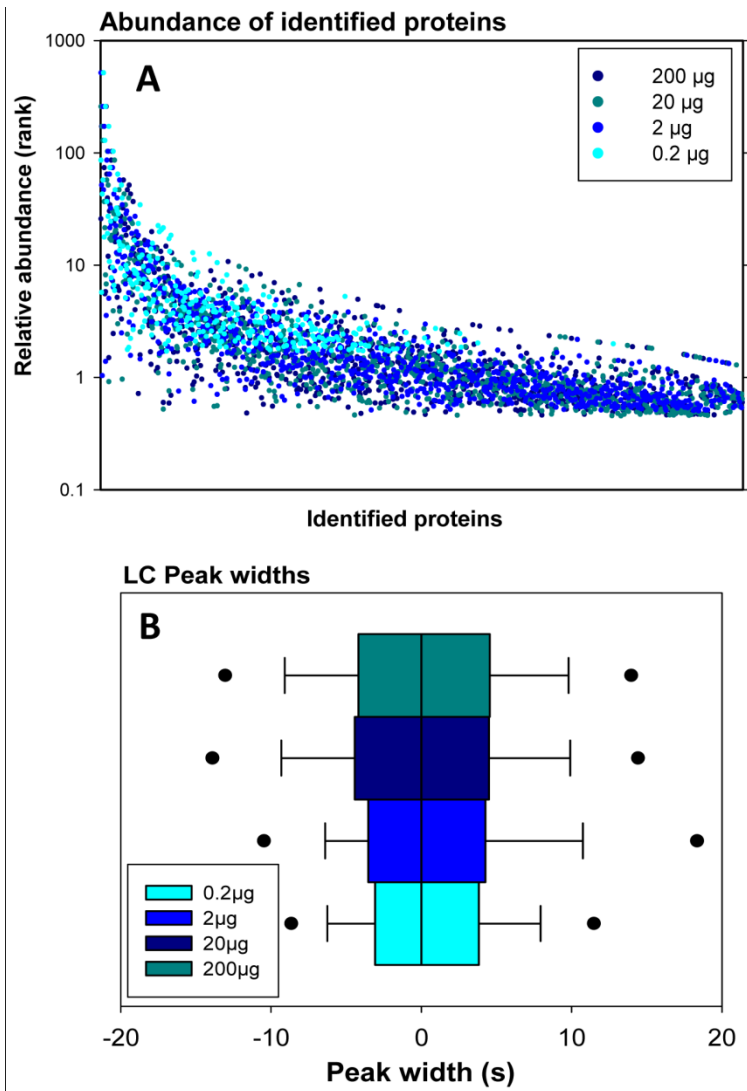

**Supplementary Figure 2:** Number of identified proteins increases if non-fragmented peaks are included based on retention time correlation of accurate masses.

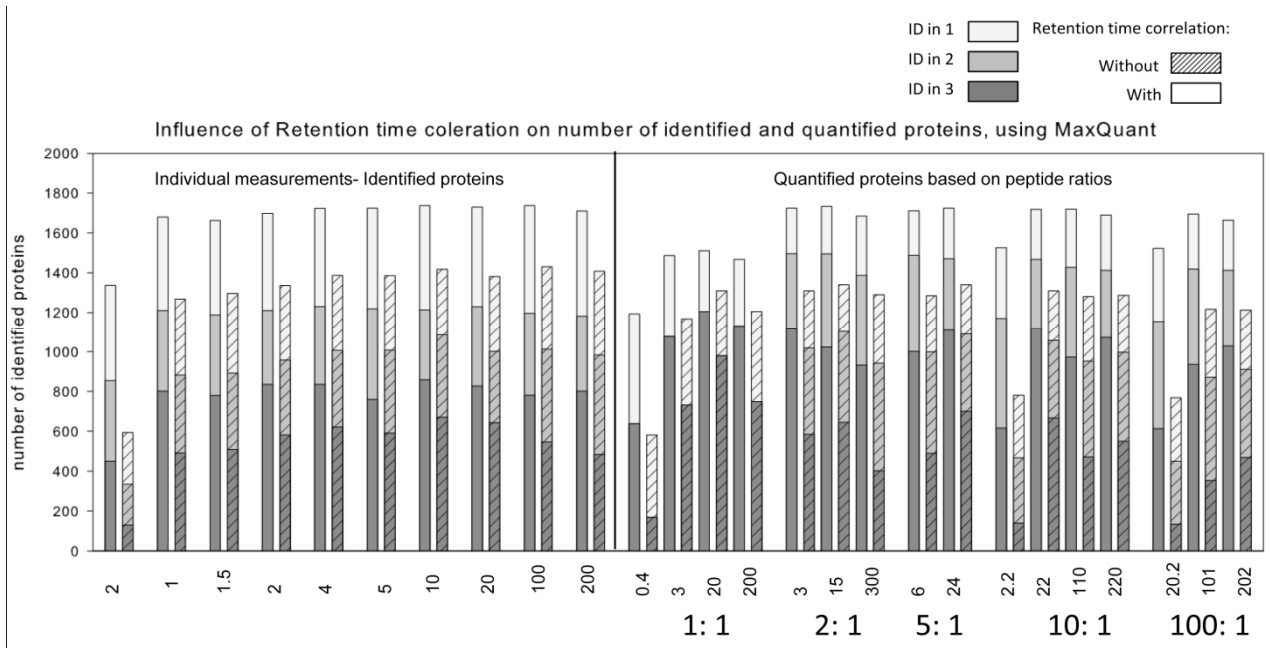

**Supplementary Figure 3:** Relationship between quantified proteins and identified proteins for metabolic labeling and label-free approach.

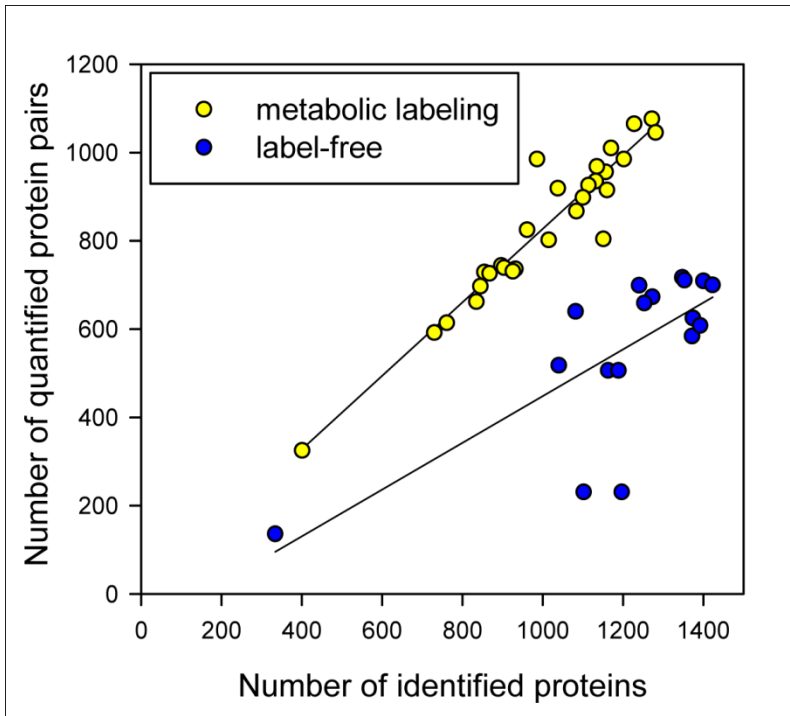

**Supplementary Figure 4:** Direct comparison of abundance  $\log_2$ -ratios for peptides identified by both methods and at different total protein amounts.

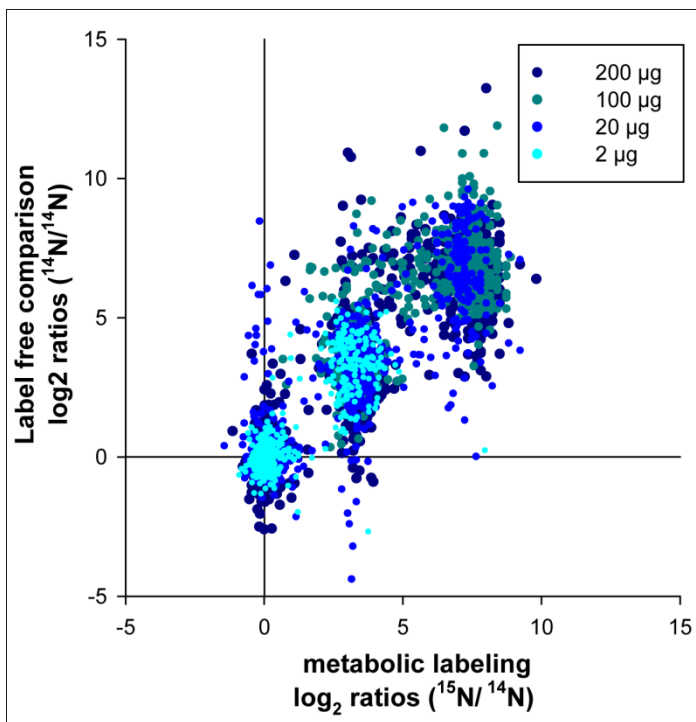

## Supplementary Tables

**Supplementary Table 1:** Nomenclature and composition of raw data files submitted to the Tranche database. **A:** Metabolic labeling approach; **B:** Label free approach.

### A: Metabolic labeling dataset

| ratio | Isotope           | composition | *.raw file name |                    |
|-------|-------------------|-------------|-----------------|--------------------|
|       | ( $\mu\text{g}$ ) |             | sample          | Technical Replicas |
| 0.01  | 0.2               | 20          | Rq              | 4,5,6              |
| 0.01  | 1                 | 100         | Rw              | 4,5,6              |
| 0.01  | 2                 | 200         | Rxx             | 4,5,6              |
| 0.1   | 0.2               | 2           | Rk              | 4,5,6              |
| 0.1   | 2                 | 20          | Rt              | 4,5,6              |
| 0.1   | 10                | 100         | Re              | 4,5,6              |
| 0.1   | 20                | 200         | Rf              | 4,5,6              |
| 0.2   | 1                 | 5           | Rm              | 4,5,6              |
| 0.2   | 4                 | 20          | Ru              | 4,5,6              |
| 0.5   | 1                 | 2           | Rc              | 4,5,6              |
| 0.5   | 5                 | 10          | Ro              | 4,5,6              |
| 0.5   | 100               | 200         | Rzz             | 4,5,6              |
| 1     | 0.2               | 0.2         | Ri              | 4,5,6              |
| 1     | 1.5               | 1.5         | RI              | 4,5,6              |
| 1     | 10                | 10          | Ra              | 4,5,6              |
| 1     | 100               | 100         | Ry              | 4,5,6              |
| 2     | 2                 | 1           | Rd              | 4,5,6              |
| 2     | 10                | 5           | Rp              | 4,5,6              |
| 2     | 200               | 100         | Rz              | 4,5,6              |
| 5     | 5                 | 1           | Rn              | 4,5,6              |
| 5     | 20                | 4           | Rv              | 4,5,6              |
| 10    | 2                 | 0.2         | Rj              | 4,5,6              |
| 10    | 20                | 2           | Rs              | 4,5,6              |
| 10    | 100               | 10          | Rg              | 4,5,6              |
| 10    | 200               | 20          | Rh              | 4,5,6              |
| 100   | 20                | 0.2         | Rr              | 4,5,6              |
| 100   | 100               | 1           | Rx              | 4,5,6              |
| 100   | 200               | 2           | Ryy             | 4,5,6              |

## B: Label-free dataset

| 14N ( $\mu\text{g}$ ) | *.raw file name |                    |
|-----------------------|-----------------|--------------------|
|                       | sample          | Technical Replicas |
| 0.2                   | 14g             | 4,5,6              |
| 1                     | 14a             | 4,5,6              |
| 1.5                   | 14h             | 4,5,6              |
| 2                     | 14b             | 4,5,6              |
| 4                     | 14i             | 4,5,6              |
| 5                     | 14j             | 4,5,6              |
| 10                    | 14c             | 4,5,6              |
| 20                    | 14d             | 4,5,6              |
| 100                   | 14e             | 4,5,6              |
| 200                   | 14f             | 4,5,6              |

**Supplementary Table 2:** Summary of the technical comparison between metabolic labeling and label free proteomic approach for *Arabidopsis thaliana* cell cultures. The values represented are based on three technical replicates for each mixing ratio and show the number of uniquely identified and quantified peptides and proteins. Ratios of peptides from multiple replicates have been averaged and these values have been used for the calculation of the median, average ratio per sample and the standard deviation from this average ratio.

| sample    | Expected ratio | Log2 (expect ratio) | Protein amount (µg) | Identified Proteins | Quant. Proteins | Quant. Peptides | median | average | stdev |
|-----------|----------------|---------------------|---------------------|---------------------|-----------------|-----------------|--------|---------|-------|
| Rq        | 0.01           | -6.64               | 20.2                | 1157                | 956             | 2917            | -5.23  | -4.95   | 1.52  |
| Rw        | 0.01           | -6.64               | 101                 | 1272                | 1076            | 3372            | -5.28  | -5.03   | 1.59  |
| Rxx       | 0.01           | -6.64               | 202                 | 1132                | 935             | 2925            | -5.45  | -5.15   | 1.58  |
| Rk        | 0.1            | -3.32               | 2.2                 | 1038                | 919             | 3249            | -3.47  | -3.33   | 0.88  |
| Rt        | 0.1            | -3.32               | 22                  | 1170                | 1010            | 3559            | -3.38  | -3.27   | 0.77  |
| Re        | 0.1            | -3.32               | 110                 | 1228                | 1065            | 3570            | -3.32  | -3.21   | 0.74  |
| Rf        | 0.1            | -3.32               | 220                 | 1114                | 926             | 3046            | -3.50  | -3.39   | 0.75  |
| Rm        | 0.2            | -2.32               | 6                   | 961                 | 825             | 3339            | -2.25  | -2.21   | 0.56  |
| Ru        | 0.2            | -2.32               | 24                  | 1135                | 968             | 3913            | -2.40  | -2.37   | 0.62  |
| Rc        | 0.5            | -1.00               | 3                   | 855                 | 729             | 3049            | -0.86  | -0.83   | 0.66  |
| Ro        | 0.5            | -1.00               | 15                  | 868                 | 726             | 3102            | -0.92  | -0.94   | 0.46  |
| Rzz       | 0.5            | -1.00               | 300                 | 897                 | 744             | 2427            | -1.06  | -1.08   | 0.45  |
| Ri        | 1              | 0.00                | 0.4                 | 401                 | 325             | 1067            | -0.26  | -0.38   | 1.13  |
| RI        | 1              | 0.00                | 3                   | 730                 | 592             | 2591            | 0.19   | 0.34    | 0.80  |
| Ra        | 1              | 0.00                | 20                  | 835                 | 662             | 2685            | 0.10   | 0.08    | 0.52  |
| Ry        | 1              | 0.00                | 200                 | 845                 | 697             | 2571            | 0.02   | -0.01   | 0.43  |
| Rd        | 2              | 1.00                | 3                   | 761                 | 614             | 2559            | 1.16   | 1.11    | 0.59  |
| Rp        | 2              | 1.00                | 15                  | 932                 | 736             | 2773            | 1.19   | 1.13    | 0.63  |
| Rz        | 2              | 1.00                | 300                 | 904                 | 739             | 2780            | 1.11   | 1.05    | 0.62  |
| Rn        | 5              | 2.32                | 6                   | 926                 | 731             | 2553            | 2.28   | 2.08    | 0.95  |
| Rv        | 5              | 2.32                | 24                  | 1084                | 867             | 2892            | 2.51   | 2.34    | 0.91  |
| Rj        | 10             | 3.32                | 2.2                 | 1015                | 802             | 2577            | 3.90   | 3.44    | 1.66  |
| Rs        | 10             | 3.32                | 22                  | 986                 | 985             | 3468            | 3.51   | 3.20    | 1.28  |
| Rg        | 10             | 3.32                | 110                 | 1151                | 804             | 2385            | 3.39   | 3.07    | 1.23  |
| Rh        | 10             | 3.32                | 220                 | 1100                | 898             | 2652            | 3.43   | 3.07    | 1.34  |
| Rr        | 100            | 6.64                | 20.2                | 1202                | 985             | 3269            | 4.21   | 3.62    | 2.87  |
| Rx        | 100            | 6.64                | 101                 | 1160                | 915             | 2829            | 4.36   | 3.65    | 2.82  |
| Ryy       | 100            | 6.64                | 202                 | 1281                | 1045            | 2954            | 4.17   | 3.71    | 2.92  |
| 14g :14g  | 1              | 0.00                | 0.4                 | 334                 | 136             | 234             | -0.02  | -0.13   | 1.01  |
| 14h : 14h | 1              | 0.00                | 3                   | 1040                | 518             | 1334            | 0.00   | 0.05    | 0.96  |
| 14c : 14c | 1              | 0.00                | 20                  | 1082                | 640             | 1993            | 0.00   | -0.08   | 1.03  |
| 14e : 14e | 1              | 0.00                | 200                 | 1189                | 506             | 1384            | 0.00   | -0.07   | 1.18  |
| 14b :14a  | 2              | 1.00                | 3                   | 1240                | 699             | 2219            | 0.92   | 1.02    | 0.80  |
| 14c : 14j | 2              | 1.00                | 15                  | 1273                | 673             | 2495            | 0.35   | 0.43    | 0.81  |
| 14f :14e  | 2              | 1.00                | 300                 | 1400                | 709             | 2194            | 1.22   | 1.28    | 0.82  |
| 14j : 14a | 5              | 2.32                | 6                   | 1253                | 659             | 2145            | 2.20   | 2.26    | 1.01  |
| 14d : 14i | 5              | 2.32                | 24                  | 1348                | 717             | 2505            | 2.06   | 2.05    | 0.79  |

|           |     |      |        |      |     |      |      |      |      |
|-----------|-----|------|--------|------|-----|------|------|------|------|
| 14b :14g  | 10  | 3.32 | 2.2    | 1102 | 231 | 552  | 2.31 | 2.25 | 1.31 |
| 14d : 14b | 10  | 3.32 | 22     | 1353 | 711 | 2413 | 2.95 | 2.98 | 1.02 |
| 14e : 14c | 10  | 3.32 | 110    | 1374 | 625 | 2111 | 3.56 | 3.44 | 1.07 |
| 14f : 14d | 10  | 3.32 | 220    | 1423 | 700 | 2269 | 3.64 | 3.65 | 0.98 |
| 14d : 14g | 100 | 6.64 | 20.2   | 1197 | 231 | 549  | 5.24 | 5.08 | 1.67 |
| 14e :14a  | 100 | 6.64 | 101    | 1372 | 584 | 1828 | 6.26 | 6.35 | 1.37 |
| 14f : 14b | 100 | 6.64 | 202    | 1392 | 608 | 1877 | 6.59 | 6.77 | 1.03 |
| 14g       |     |      | 0.20   | 334  |     |      |      |      |      |
| 14h       |     |      | 1.50   | 1040 |     |      |      |      |      |
| 14a       |     |      | 1.00   | 1036 |     |      |      |      |      |
| 14b       |     |      | 2.00   | 1093 |     |      |      |      |      |
| 14i       |     |      | 4.00   | 1100 |     |      |      |      |      |
| 14j       |     |      | 5.00   | 1092 |     |      |      |      |      |
| 14c       |     |      | 10.00  | 1082 |     |      |      |      |      |
| 14d       |     |      | 20.00  | 1186 |     |      |      |      |      |
| 14e       |     |      | 100.00 | 1189 |     |      |      |      |      |
| 14f       |     |      | 200.00 | 1163 |     |      |      |      |      |



**Supplementary Table 3:** Influence of retention time correlation (RTC) in the number of quantified proteins based on peptide ratios. The percent of increase for quantified proteins from MaxQuant has been applied to estimate the expected influence of RTC on the label free data quantified by MSQuant.

|                     |       | MaxQuant               |                     |                    | MsQuant                           |                                                                            |                                           |
|---------------------|-------|------------------------|---------------------|--------------------|-----------------------------------|----------------------------------------------------------------------------|-------------------------------------------|
| Protein amount (µg) | Ratio | Quantified without RTC | Quantified with RTC | %increase with RTC | Label-free quantified without RTC | Estimated quantified prot. using increase in Percent for RTC from MaxQuant | Metabolic Labeling quantified without RTC |
| 0.4                 | 1: 1  | 582                    | 1193                | 105                | 136                               | 279                                                                        | 325                                       |
| 3                   |       | 1168                   | 1486                | 27                 | 518                               | 659                                                                        | 592                                       |
| 20                  |       | 1310                   | 1511                | 15                 | 640                               | 738                                                                        | 662                                       |
| 200                 |       | 1205                   | 1468                | 22                 | 506                               | 616                                                                        | 697                                       |
| 3                   | 2:1   | 1309                   | 1725                | 32                 | 699                               | 921                                                                        | 614                                       |
| 15                  |       | 1339                   | 1733                | 29                 | 673                               | 871                                                                        | 736                                       |
| 300                 |       | 1290                   | 1685                | 31                 | 709                               | 926                                                                        | 739                                       |
| 6                   | 5:1   | 1285                   | 1711                | 33                 | 659                               | 877                                                                        | 731                                       |
| 24                  |       | 1339                   | 1724                | 29                 | 717                               | 923                                                                        | 867                                       |
| 2.2                 | 10:1  | 781                    | 1526                | 95                 | 231                               | 451                                                                        | 802                                       |
| 22                  |       | 1309                   | 1719                | 31                 | 711                               | 934                                                                        | 985                                       |
| 110                 |       | 1280                   | 1720                | 34                 | 625                               | 840                                                                        | 804                                       |
| 220                 |       | 1287                   | 1691                | 31                 | 700                               | 920                                                                        | 898                                       |
| 20.2                | 100:1 | 768                    | 1522                | 98                 | 231                               | 458                                                                        | 985                                       |
| 101                 |       | 1217                   | 1695                | 39                 | 584                               | 813                                                                        | 915                                       |
| 202                 |       | 1213                   | 1664                | 37                 | 608                               | 834                                                                        | 1045                                      |
